# Supplementary material
Source: PubMed Central journal article supplement (PMC8742908)
Supplement: jamaneurol-e214998-s003.pdf [file jamaneurol-e214998-s003.pdf]

## Data Sharing Statement

Mekhail. Durability of Clinical and Quality-of-Life Outcomes of Closed-Loop Spinal Cord Stimulation for Chronic Back and Leg Pain. *JAMA Neurol.* Published January 08, 2022. doi:10.1001/jamaneurol.2021.4998

### Data

**Data available:** No
